# Supplementary material for: In situ creation of a catalytic multiphase and multiscale surroundings for remarkable hydrogen storage performance of MgH2
Source: Royal Society of Chemistry journal article supplement (doi:10.1039/d3ta06754h), 2023-12-22
Supplement: d3ta06754h1.pdf [file d3ta06754h1.pdf]

## Electronic Supplementary Information

### **In situ creation of catalytic multiphase and multiscale surroundings for remarkable hydrogen storage performance of MgH<sub>2</sub>**

Lingchao Zhang,<sup>a</sup> Xin Zhang,<sup>ab</sup> Wenxuan Zhang,<sup>a</sup> Fang Fang<sup>\*c</sup>, Juan Li<sup>d</sup>, Jianjiang Hu<sup>e</sup>, Changdong Gu<sup>a</sup>, Wenping Sun<sup>a</sup>, Mingxia Gao<sup>a</sup>, Hongge Pan<sup>\*af</sup>, Yongfeng Liu<sup>\*abf</sup>

<sup>a</sup>State Key Laboratory of Silicon and Advanced Semiconductor Materials and Engineering, Zhejiang University, Hangzhou 310058, China. E-mail address: mselyf@zju.edu.cn

<sup>b</sup>Taizhou Institute of Zhejiang University, Taizhou 318000, China.

<sup>c</sup>Department of Materials Science, Fudan University, Shanghai, 200433 China. E-mail address: f\_fang@fudan.edu.cn

<sup>d</sup>College of Materials Science and Engineering, Zhejiang University of Technology, Hangzhou, 310014, China

<sup>e</sup>School of Chemistry and Chemical Engineering, Yantai University, Yantai, 264005, China

<sup>f</sup>Institute of Science and Technology for New Energy, Xi'an Technological University, Xi'an, 710021, China. E-mail address: hgpan@zju.edu.cn

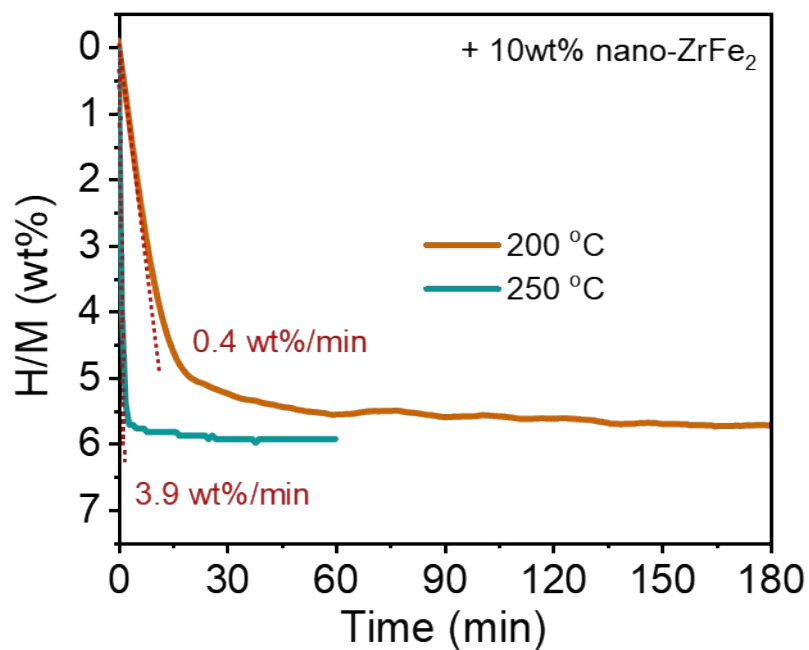

**Fig. S1.** Isothermal desorption curves of the sample with 10 wt% nano-ZrFe<sub>2</sub> at 200 °C and 250 °C.

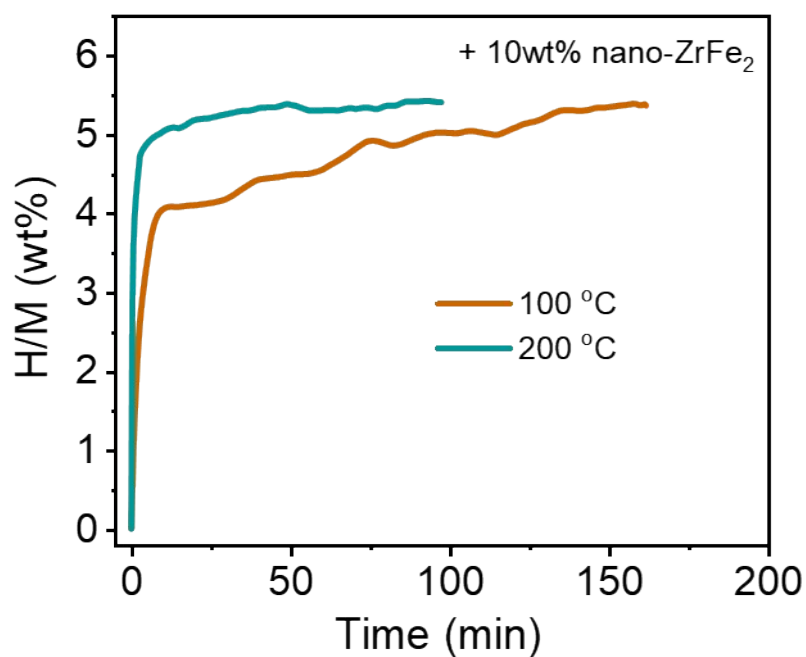

**Fig. S2.** Isothermal hydrogenation curves of the dehydrogenated sample with 10 wt% nano-ZrFe<sub>2</sub> at 100 °C and 200 °C.

**Table S1.** The weight and atomic percentage of Mg, Zr and Fe calculated from EDS results shown in Fig. 4

| Element | Line type | 10 wt% nano-               | 10 wt% nano-                | 10wt% bulk-                | 10wt% bulk-                 |
|---------|-----------|----------------------------|-----------------------------|----------------------------|-----------------------------|
|         |           | ZrFe <sub>2</sub><br>(wt%) | ZrFe <sub>2</sub><br>(mol%) | ZrFe <sub>2</sub><br>(wt%) | ZrFe <sub>2</sub><br>(mol%) |
| Mg      | K-line    | 89.38                      | 95.90                       | 90.97                      | 96.45                       |
| Fe      | K-line    | 5.86                       | 2.74                        | 5.58                       | 2.58                        |
| Zr      | L-line    | 4.76                       | 1.36                        | 3.45                       | 0.97                        |
| Amount  |           | 100                        | 100                         | 100                        | 100                         |

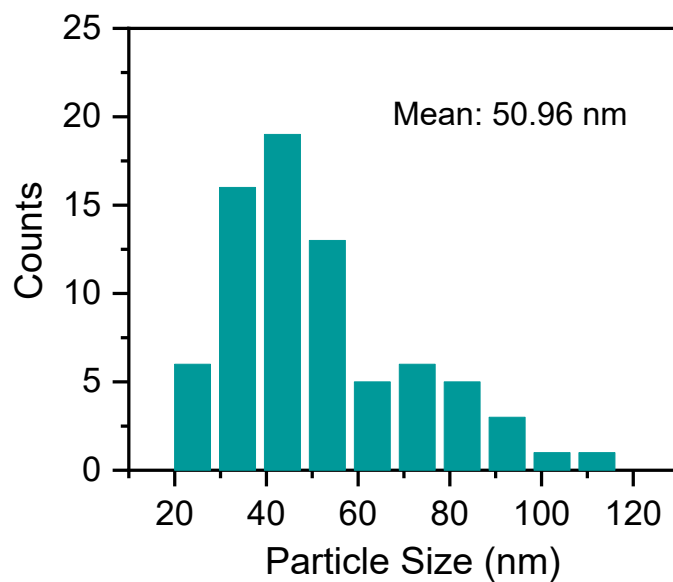

**Fig. S3.** The particle size distribution of nano-ZrFe<sub>2</sub> after ball milling shown in Fig. 4b

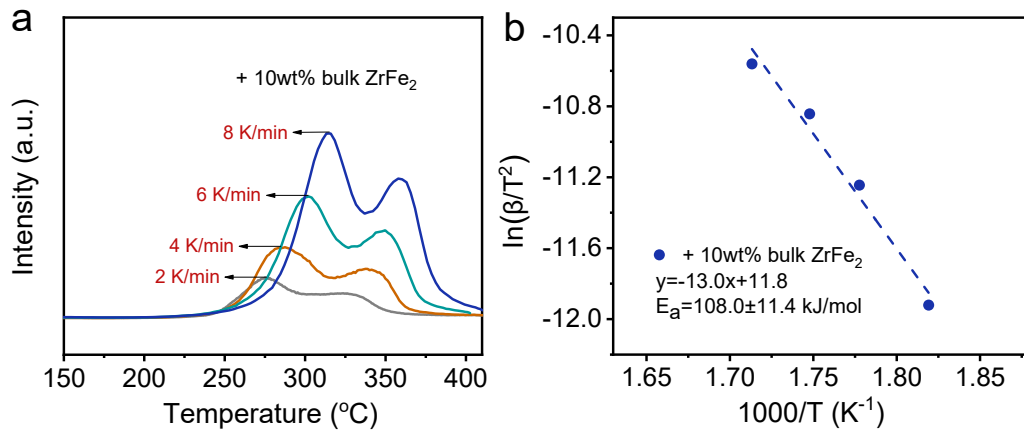

**Fig. S4.** TPD curves (a) and post-fitted Kissinger's plots (b) of MgH<sub>2</sub> + 10 wt% bulk-ZrFe<sub>2</sub> sample under different heating rates.

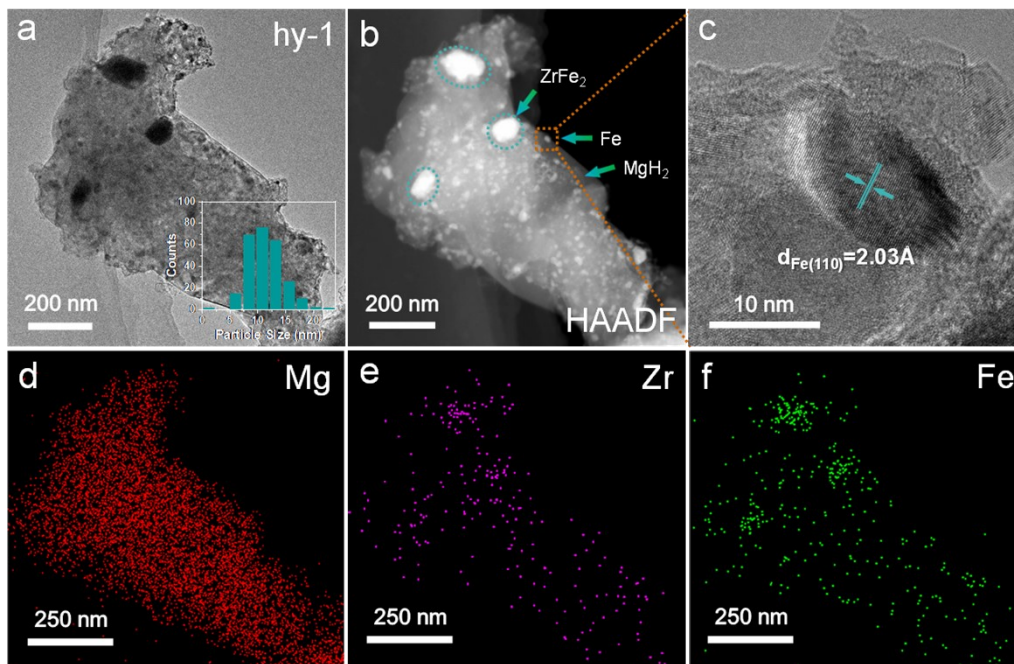

**Fig. S5.** TEM (a), HAADF (b), HRTEM (c) images and corresponding EDS mappings (d-f) of the hydrogenated MgH<sub>2</sub> + 10 wt% nano-ZrFe<sub>2</sub> composite. The inset of (a) is Fe particles size distribution.

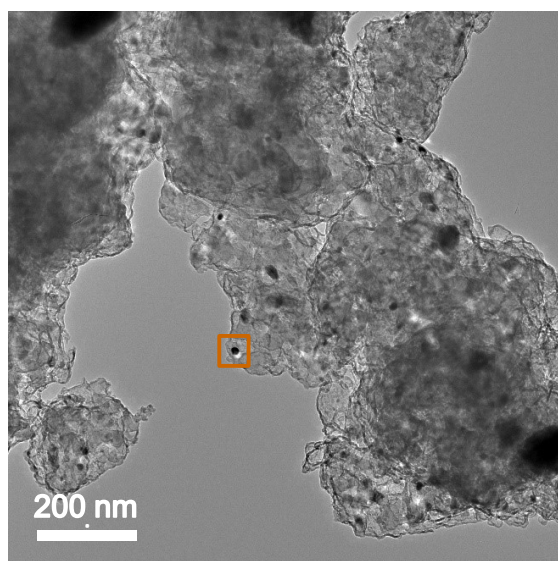

**Fig. S6.** Low-magnification TEM image of the  $\text{MgH}_2 + 10 \text{ wt}\%$  nano- $\text{ZrFe}_2$  composite dehydrogenated at  $250 \text{ }^\circ\text{C}$ . The marked-out area is the particle shown in Fig. 8.

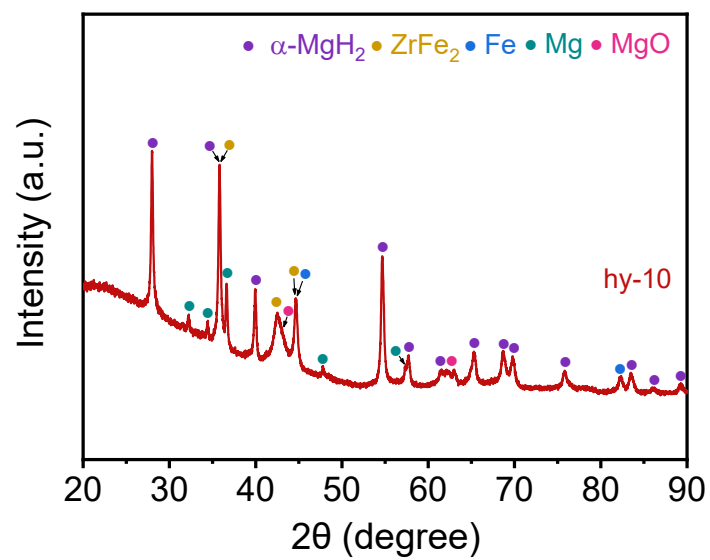

**Fig. S7.** XRD pattern of the nano- $\text{ZrFe}_2$ -containing sample after 10 cycles.

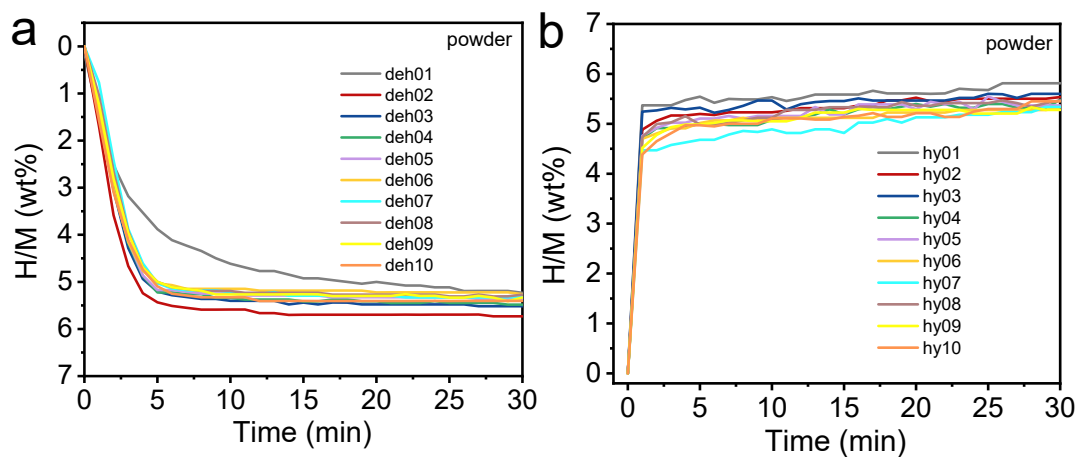

**Fig. S8.** Comparative analysis of isothermal hydrogen desorption (a) and absorption (b) curves during cycling at 250 °C of the  $\text{MgH}_2 + 10 \text{ wt\% nano-ZrFe}_2$  powder sample.

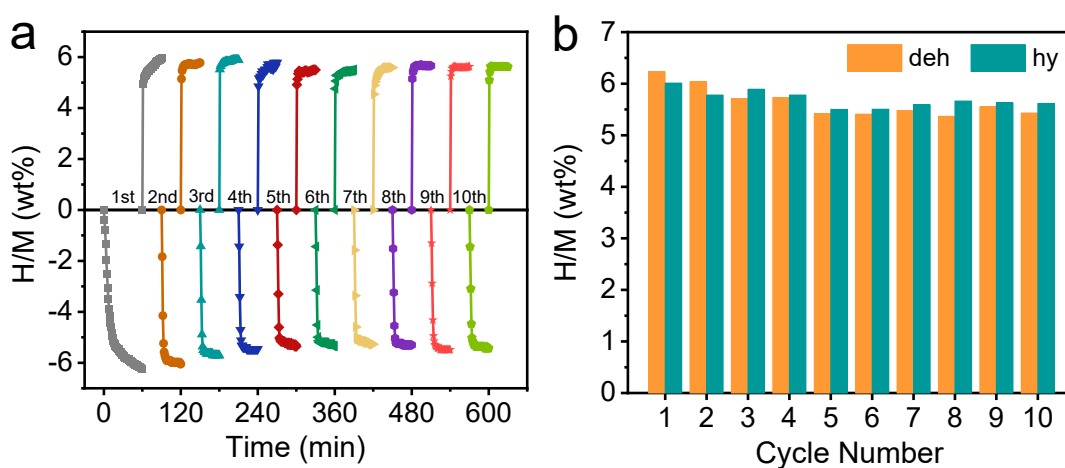

**Fig. S9.** Isothermal hydrogen absorption and desorption cycling curves at 250 °C (a) and the cycling capacity (b) of the  $\text{MgH}_2 + 10 \text{ wt\% nano-ZrFe}_2$  pellet sample.

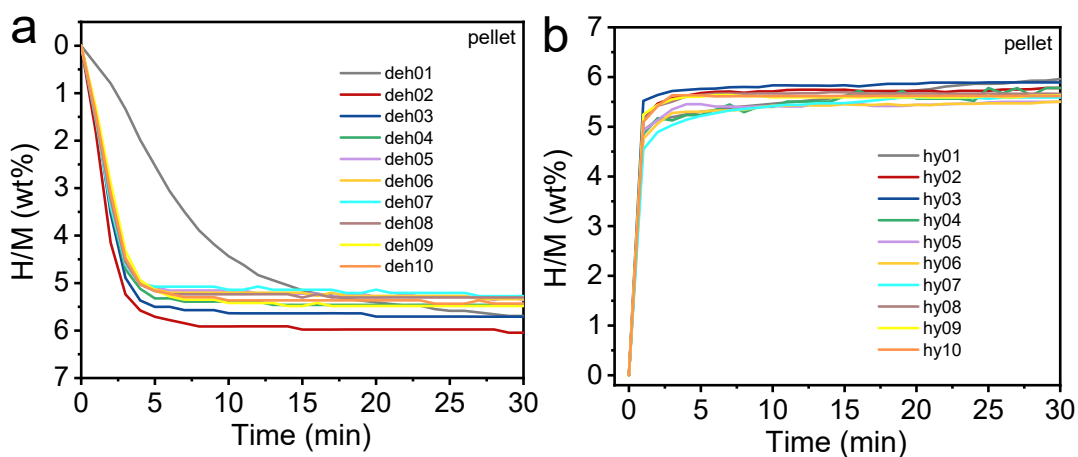

**Fig. S10.** Comparative analysis of isothermal hydrogen desorption (a) and absorption (b) curves during cycling at 250 °C of the MgH<sub>2</sub> + 10 wt% nano-ZrFe<sub>2</sub> pellet sample.

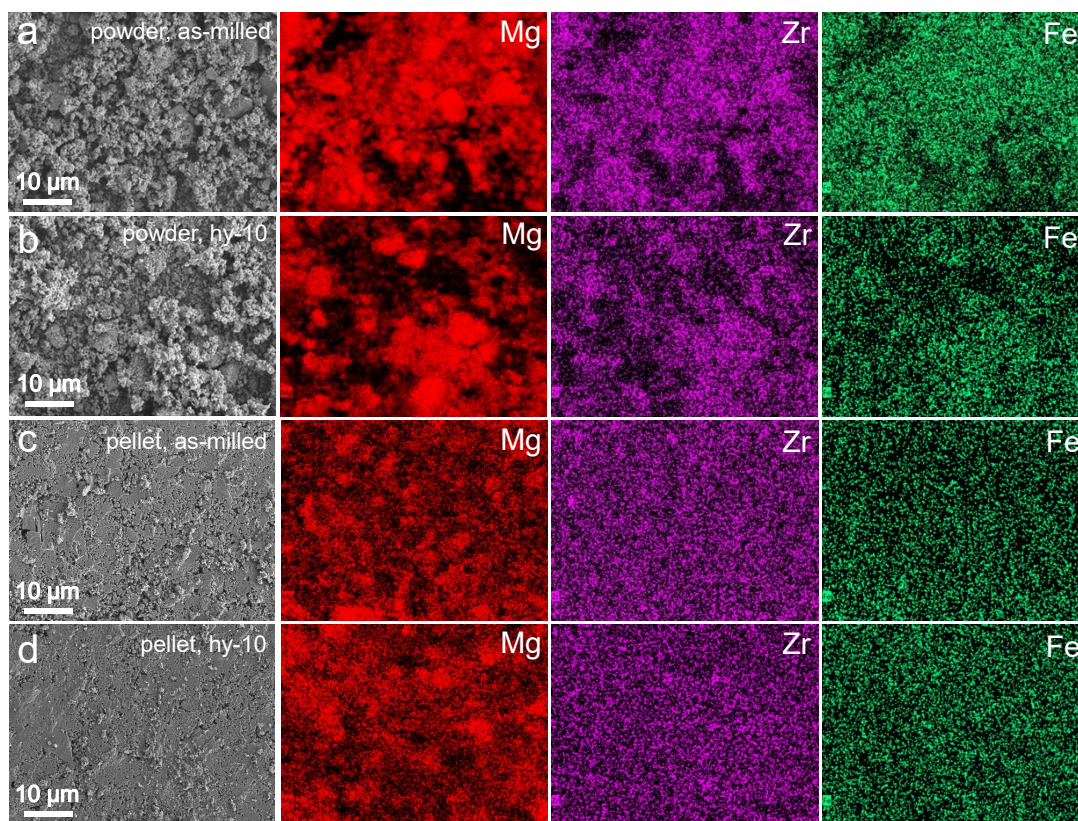

**Fig. S11.** SEM images and EDS mappings of Mg, Zr and Fe for the as-milled (a, c) and the 10<sup>th</sup> hydrogenated MgH<sub>2</sub> + 10 wt% nano-ZrFe<sub>2</sub> samples (b, d) in powder form (a, b) and cold-pressed pellet (c, d).
